# Supplementary material for: Impact of Shiga-toxin encoding gene transduction from O80:H2 Shiga toxigenic Escherichia coli (STEC) on non-STEC strains
Source: PubMed Central journal article supplement (PMC9751135; doi:10.1038/s41598-022-26198-8), 2022-12-14

**Figure S1: Intergenic distance between vB\_EcoS\_ULI-O80\_Stx2d phage and related bacteriophages.**

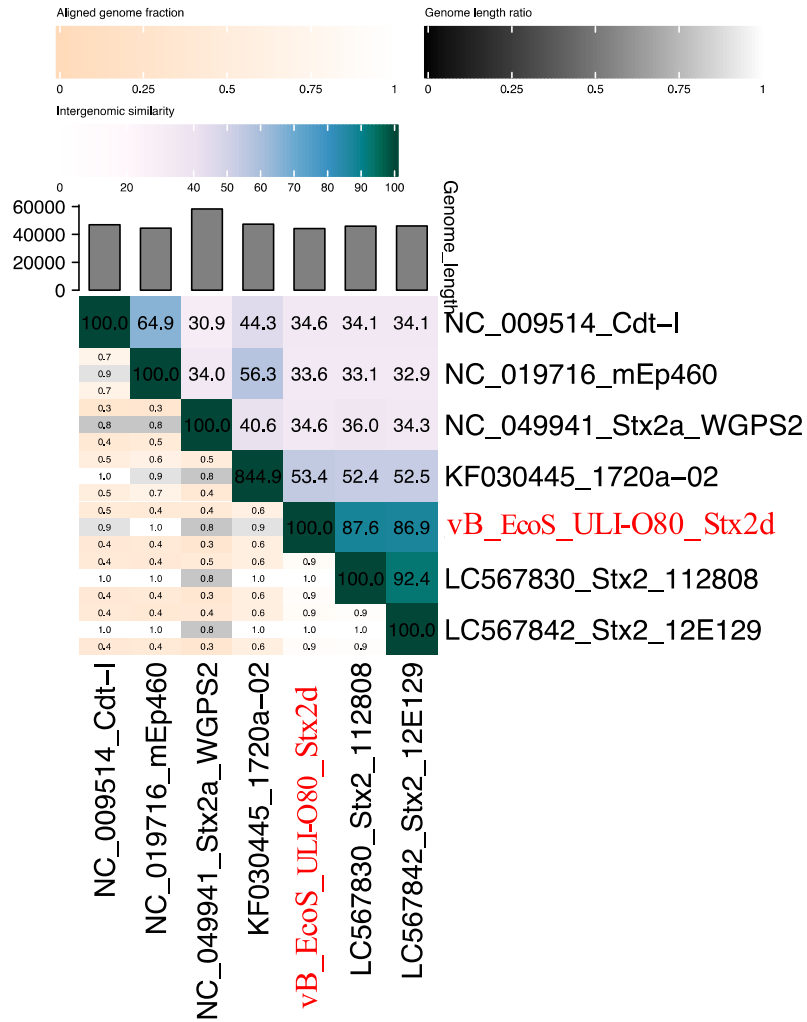

Supplement: 41598_2022_26198_MOESM1_ESM.pdf [file 41598_2022_26198_MOESM1_ESM.pdf]
